# Supplementary material for: Dynamic Evolution of Aquaculture along the Bohai Sea Coastline and Implications for Eco-Coastal Vegetation Restoration Based on Remote Sensing
Source: MDPI journal article supplement (doi:10.3390/plants13020160), 2024-01-06
Supplement: s1 [file s1]

# The data identification of the Landsat images

1984

LT05\_L1TP\_118032\_19840914\_20170220\_01\_T1

LT05\_L1TP\_119032\_19840905\_20170220\_01\_T1

LT05\_L1TP\_119033\_19840905\_20170220\_01\_T1

LT05\_L1TP\_119034\_19840905\_20170220\_01\_T1

LT05\_L1TP\_120032\_19840827\_20170220\_01\_T1

LT05\_L1TP\_120033\_19840827\_20170220\_01\_T1

LT05\_L1TP\_120034\_19840827\_20170220\_01\_T1

LT05\_L1TP\_121032\_19840903\_20170220\_01\_T1

LT05\_L1TP\_121033\_19840919\_20170220\_01\_T1

LT05\_L1TP\_121034\_19840717\_20170220\_01\_T1

LT05\_L1TP\_122033\_19840910\_20170220\_01\_T1

LT05\_L1TP\_122034\_19840910\_20170220\_01\_T1

1987

LT05\_L1TP\_118032\_19870603\_20170212\_01\_T1

LT05\_L1TP\_119032\_19870626\_20170212\_01\_T1

LT05\_L1TP\_119033\_19870626\_20170212\_01\_T1

LT05\_L1TP\_119034\_19870930\_20170418\_01\_T1

LT05\_L1TP\_120032\_19871007\_20170211\_01\_T1

LT05\_L1TP\_120033\_19870921\_20170211\_01\_T1

LT05\_L1TP\_120034\_19870921\_20170211\_01\_T1

LT05\_L1TP\_121032\_19870912\_20170418\_01\_T1

LT05\_L1TP\_121033\_19870912\_20170418\_01\_T1

LT05\_L1TP\_121034\_19870608\_20170212\_01\_T1

LT05\_L1TP\_122033\_19870919\_20170211\_01\_T1

LT05\_L1TP\_122034\_19870919\_20170211\_01\_T1

1992

LT05\_L1TP\_118032\_19920920\_20170122\_01\_T1

LT05\_L1TP\_119032\_19921013\_20170122\_01\_T1

LT05\_L1TP\_119033\_19920607\_20170123\_01\_T1

LT05\_L1TP\_119034\_19920927\_20170214\_01\_T1

LT05\_L1TP\_120032\_19920817\_20170122\_01\_T1

LT05\_L1TP\_120033\_19920614\_20170124\_01\_T1

LT05\_L1TP\_120034\_19920801\_20170214\_01\_T1

LT05\_L1TP\_121032\_19920909\_20170214\_01\_T1

LT05\_L1TP\_121033\_19920925\_20170121\_01\_T1

LT05\_L1TP\_121034\_19920909\_20170214\_01\_T1

LT05\_L1TP\_122033\_19920527\_20170122\_01\_T1

LT05\_L1TP\_122034\_19921018\_20170122\_01\_T1

1997

LT05\_L2SP\_118032\_19970614\_20200910\_02\_T1

LT05\_L2SP\_119032\_19970707\_20200910\_02\_T1

LT05\_L2SP\_119033\_19970707\_20200910\_02\_T1

LT05\_L2SP\_119034\_19970621\_20200910\_02\_T1

LT05\_L2SP\_120034\_19971018\_20200909\_02\_T1

LT05\_L2SP\_120032\_19971018\_20200909\_02\_T1

LT05\_L2SP\_120033\_19971018\_20200910\_02\_T1

LT05\_L2SP\_121032\_19971009\_20200909\_02\_T1

LT05\_L2SP\_121033\_19971009\_20200909\_02\_T1

LT05\_L2SP\_121034\_19970923\_20200909\_02\_T1

LT05\_L2SP\_122033\_19970930\_20200910\_02\_T1

LT05\_L2SP\_122034\_19970813\_20200910\_02\_T1

2002

LE07\_L2SP\_118032\_20020519\_20200917\_02\_T1

LE07\_L2SP\_119032\_20020830\_20200916\_02\_T1

LE07\_L2SP\_119033\_20020830\_20200916\_02\_T1

LE07\_L2SP\_119034\_20021001\_20200916\_02\_T1

LE07\_L2SP\_120034\_20020906\_20200916\_02\_T1

LE07\_L2SP\_120032\_20020922\_20200916\_02\_T1

LE07\_L2SP\_120033\_20020922\_20200916\_02\_T1

LE07\_L2SP\_121032\_20021015\_20200916\_02\_T1

LE07\_L2SP\_121033\_20021015\_20200916\_02\_T1

LE07\_L2SP\_121034\_20021015\_20200916\_02\_T1

LE07\_L2SP\_122033\_20021006\_20200916\_02\_T1

LE07\_L2SP\_122034\_20020531\_20200917\_02\_T1

2007

LT05\_L1TP\_118032\_20070930\_20161110\_01\_T1

LT05\_L1TP\_119032\_20070921\_20161112\_01\_T1

LT05\_L1TP\_119033\_20070905\_20161111\_01\_T1

LT05\_L1TP\_119034\_20070921\_20161112\_01\_T1

LT05\_L1TP\_120034\_20070421\_20161115\_01\_T1

LT05\_L1TP\_120032\_20070928\_20161110\_01\_T1

LT05\_L1TP\_120033\_20070928\_20161110\_01\_T1

LT05\_L1TP\_121032\_20070615\_20161113\_01\_T1

LT05\_L1TP\_121033\_20070514\_20161115\_01\_T1

LT05\_L1TP\_121034\_20070514\_20161115\_01\_T1

LT05\_L1TP\_122033\_20070403\_20161116\_01\_T1

LT05\_L2SP\_122034\_20070809\_20200830\_02\_T1

2012

LC08\_L1TP\_118032\_20131016\_20170429\_01\_T1

LC08\_L1TP\_119032\_20130516\_20170504\_01\_T1

LC08\_L1TP\_119033\_20130516\_20170504\_01\_T1

LC08\_L1TP\_119034\_20130820\_20170502\_01\_T1

LC08\_L1TP\_120032\_20131030\_20170429\_01\_T1

LC08\_L1TP\_120033\_20130523\_20170504\_01\_T1

LC08\_L1TP\_120034\_20130523\_20170504\_01\_T1

LC08\_L1TP\_121032\_20130530\_20170504\_01\_T1

LC08\_L1TP\_121033\_20131005\_20170429\_01\_T1

LC08\_L1TP\_121034\_20131005\_20170429\_01\_T1

LC08\_L1TP\_122033\_20130926\_20170502\_01\_T1

LC08\_L2SP\_122034\_20131012\_20200912\_02\_T1

2017

LC08\_L2SP\_118032\_20170605\_20200903\_02\_T1

LC08\_L2SP\_119032\_20171002\_20200903\_02\_T1

LC08\_L2SP\_119033\_20171002\_20200903\_02\_T1

LC08\_L1TP\_119034\_20171002\_20200903\_02\_T1

LC08\_L2SP\_120032\_20170923\_20200903\_02\_T1

LC08\_L2SP\_120033\_20170923\_20200903\_02\_T1

LC08\_L1TP\_120034\_20170923\_20171012\_01\_T1

LC08\_L1TP\_121032\_20171016\_20171024\_01\_T1

LC08\_L1TP\_121033\_20170712\_20170726\_01\_T1

LC08\_L1TP\_121034\_20170930\_20171013\_01\_T1

LC08\_L1TP\_122033\_20171023\_20171107\_01\_T1

LC08\_L2SP\_122034\_20171023\_20200902\_02\_T1

2022

LC08\_L2SP\_118032\_20221025\_20221107\_02\_T1

LC09\_L2SP\_119032\_20220906\_20230330\_02\_T1

LC08\_L2SP\_119033\_20220930\_20221005\_02\_T1

LC08\_L2SP\_119034\_20220930\_20221005\_02\_T1

LC08\_L2SP\_120032\_20221007\_20221013\_02\_T1

LC08\_L2SP\_120033\_20221007\_20221013\_02\_T1

LC08\_L2SP\_120034\_20221023\_20221101\_02\_T1

LC09\_L2SP\_121032\_20221022\_20230325\_02\_T1

LC08\_L2SP\_121033\_20220928\_20221004\_02\_T1

LC08\_L2SP\_121034\_20220928\_20221004\_02\_T1

LC08\_L2SP\_122033\_20220919\_20220928\_02\_T1

LC08\_L2SP\_122034\_20221005\_20221012\_02\_T1
